# Supplementary material for: CHD7 Targets Active Gene Enhancer Elements to Modulate ES Cell-Specific Gene Expression
Source: PLoS Genet. 2010 Jul 15;6(7):e1001023. doi: 10.1371/journal.pgen.1001023 (PMC2904778; doi:10.1371/journal.pgen.1001023)
Supplement: Table S3 — Genes that are non-differentially expressed. (0.11 MB XLS) [file pgen.1001023.s008.xls]

## Sheet: Sheet1
Supplemental Table III - Genes that are non-differentially expressed
Gene_symbol	Accession_No.	Fold_change (wildtpye/Chd7_null)	No. of CHD7 sites within 200KB of TSS
Mterf	NM_001013023	1.02	1
1700109H08Rik	NM_029843	1.02	3
Gm12657	NM_001081019	1.02	0
Sorbs1	NM_001034962	1.02	2
Tecpr2	NM_001081057	1.01	5
Fndc5	NM_027402	1.01	8
Gcdh	NM_001044744	1.02	9
Kpna7	NM_001013774	1.02	1
Phrf1	NM_001081118	1.02	5
Zfp91	NM_053009	1.02	0
Ibsp	NM_008318	1.02	5
Arap1	NM_001040111	1.01	1
Tbata	NM_001017441	1.01	6
U46068	NM_001012392	1.03	2
6330545A04Rik	NM_001081174	1.02	4
6330534C20Rik	NM_001034059	0.99	5
Olfr1029	NM_001011852	1.02	1
Olfr1513	NM_001012269	1.01	3
Tgif1	NM_009372	1.01	21
Lrrc45	NM_153545	1	2
Dynlrb2	NM_029297	0.9	3
Cxcl9	NM_008599	1.01	3
Flcn	NM_146018	1.01	3
Col6a2	NM_146007	1.01	1
Oc90	NM_010953	1	2
Sept_3	NM_011889	1.01	2
V1rh18	NM_134241	1	2
Usp8	NM_019729	1	2
Prps1l1	NM_029294	0.99	1
Fpr3	NM_008042	1.01	0
Gtf3c5	NM_148928	1	2
Cln3	NM_009907	1.01	5
Steap4	NM_054098	1.01	1
Slc5a11	NM_146198	0.99	5
Eif3h	NM_080635	1.01	4
Zfy1	NM_009570	1.01	0
Scd3	NM_024450	1.01	6
Abi2	NM_198127	1.01	3
Serpina7	NM_177920	1.01	0
Cplx1	NM_007756	1	1
Retnla	NM_020509	1.01	0
Impdh1	NM_011829	1	2
Ehbp1l1	NM_053252	1	11
Gjb2	NM_008125	1.01	0
Apool	NM_026565	1.01	1
Irf7	NM_016850	1	4
2310003L22Rik	NM_027093	1.01	1
Wee1	NM_009516	1.01	10
Cd19	NM_009844	1	5
Gucy1a3	NM_021896	1	1
H2-T24	NM_008207	1	10
Tspan13	NM_025359	1.01	0
Wnt9b	NM_011719	0.97	1
Dhx29	NM_172594	1.01	3
Jak3	NM_010589	1.01	5
Krtap9-3	NM_029351	1.01	0
Wdr37	NM_172445	1.01	2
F11	NM_028066	1	2
Acss3	NM_198636	1.01	0
Tnp1	NM_009407	0.95	3
Foxa1	NM_008259	0.99	2
Orc5l	NM_011959	1.01	3
Serpina5	NM_172953	1.01	1
Klk1b4	NM_010915	1	4
Hnf4g	NM_013920	0.98	0
Med8	NM_173719	1.01	3
Pigb	NM_018889	1.01	7
Chmp1b	NM_024190	1.01	10
Rrp9	NM_145620	1.01	1
Zfp335	NM_199027	1.01	5
Ndufs2	NM_153064	1	8
Abca3	NM_013855	1	2
Cdc14b	NM_172587	1.01	6
1110005A03Rik	NM_028865	1.01	5
Cldn13	NM_020504	1.01	5
B3galt5	NM_033149	1.01	1
Vsig2	NM_020518	1.01	4
Col4a3bp	NM_023420	1	0
Dnajc30	NM_025362	1.01	6
Sptlc3	NM_175467	0.98	0
Scamp2	NM_022813	1.01	3
Mgat5b	NM_172948	1	9
Nfam1	NM_028728	1	5
Gvin1	NM_029000	1.01	0
E2f2	NM_177733	1	6
2810021J22Rik	NM_172403	1.01	1
Ppp2r2c	NM_172994	1	3
Slamf1	NM_013730	1	0
Xrcc6bp1	NM_026858	0.95	5
D19Ertd386e	NM_177464	1.01	2
Olfr1048	NM_147014	1.01	1
Il1f6	NM_019450	1	0
Flrt3	NM_178382	1.01	1
Olfr677	NM_146358	1	0
Rbx1	NM_019712	1.01	7
Kdm5c	NM_013668	1	0
Gpr61	NM_175470	1.01	4
Por	NM_008898	1.01	6
Ndp	NM_010883	0.97	0
Ank	NM_020332	1.01	1
Edar	NM_010100	0.97	1
Ranbp3l	NM_198024	0.98	3
Rdbp	NM_138580	1.01	5
Cd40lg	NM_011616	1.01	1
Rps8	NM_009098	1.01	10
1110004E09Rik	NM_026502	1	0
Uroc1	NM_144940	1.01	3
Wdr35	NM_172470	1	1
Aff2	NM_008032	1.01	0
Ddx47	NM_026360	1.01	4
Mrpl23	NM_011288	1.01	0
1600029D21Rik	NM_029639	1	0
Arntl2	NM_172309	1	2
Mmp28	NM_080453	1.01	1
Jmy	NM_021310	1	0
Slc9a3r1	NM_012030	1.01	1
Anxa3	NM_013470	1.01	2
Ergic2	NM_026168	1.02	2
Zfyve16	NM_173392	1.01	5
Tdh	NM_021480	0.99	5
BC002199	NM_145964	1.01	0
4933427D14Rik	NM_028963	1.01	0
Mylip	NM_153789	0.98	2
Elp4	NM_023876	1	0
BC003266	NM_030252	1.01	8
Rph3a	NM_011286	1.01	0
Uxt	NM_013840	1	1
2310016M24Rik	NM_183256	1.01	12
Trabd	NM_026485	0.99	4
Rpl7l1	NM_025433	1	6
Angel1	NM_144524	1	18
Rtn2	NM_013648	1.01	2
Trib3	NM_175093	1.01	6
Zc3h15	NM_026934	1.01	2
Tepp	NM_199455	1	10
Prl7a1	NM_008930	0.97	1
Usf1	NM_009480	1.01	7
Ddah1	NM_026993	1.01	1
Asgr2	NM_007493	1	0
Ctsf	NM_019861	0.98	4
Egln1	NM_053207	1	0
Thap1	NM_199042	1.01	4
Mrpl30	NM_027098	1.01	2
Tuba3b	NM_009449	1.01	0
Apoa1	NM_009692	1.01	2
Tmem116	NM_029912	1	3
Usp11	NM_145628	1.01	1
Pga5	NM_021453	0.99	2
Tsg101	NM_021884	1	0
Zswim4	NM_172503	1.01	13
Serpinb6c	NM_148942	0.95	5
Uqcrb	NM_026219	1.01	0
Ttc15	NM_178811	1.01	1
Zfp101	NM_009542	1.01	1
Ccdc32	NM_199310	1.01	1
Bcat1	NM_007532	1.01	6
Canx	NM_007597	1	1
1700029I15Rik	NM_183112	1	2
Rars	NM_025936	1.01	0
S100b	NM_009115	0.97	1
Socs1	NM_009896	1	2
Surf4	NM_011512	1.01	1
Cnr1	NM_007726	1.01	2
Cyhr1	NM_019396	1	5
Cyp24a1	NM_009996	1.01	3
Saps1	NM_172894	1.01	5
Sipa1	NM_011379	0.99	11
Aasdhppt	NM_026276	1.01	0
Tm2d3	NM_026795	1.01	1
AF529169	NM_153509	1.01	0
Ptprcap	NM_016933	1.01	4
Rabep1	NM_019400	1.01	4
Mgat3	NM_010795	1	3
1200009F10Rik	NM_027078	1.01	6
Atp6ap2	NM_027439	1.01	1
Ubxn11	NM_026257	0.97	5
Nr5a2	NM_030676	1	5
Mcph1	NM_173189	1.01	0
Skint10	NM_177668	1	0
Fut10	NM_134161	0.97	1
Nfkb2	NM_019408	1	4
Mrpl45	NM_025927	0.99	15
H3f3b	NM_008211	1.01	8
Mrm1	NM_145433	1.01	6
Nt5c1b	NM_027588	1	1
Oas2	NM_145227	1	1
Fam184b	NM_021416	1.01	2
Slc17a4	NM_177016	0.99	7
Defa20	NM_183268	1.01	0
Rac1	NM_009007	1.01	0
Map2k3	NM_008928	1.01	4
Atp5sl	NM_025504	1.01	2
Bxdc2	NM_026396	1.01	5
Nkx2-6	NM_010920	1.01	0
Egf	NM_010113	1	2
Gpm6a	NM_153581	1.01	0
Fermt2	NM_146054	1.01	11
Pcgf3	NM_172716	1.01	0
Wdr78	NM_146254	1.01	3
Scarf2	NM_153790	1	1
Rpl22l1	NM_026517	1.01	1
Cdh7	NM_172853	0.99	0
Snf8	NM_033568	1.01	22
1700034H14Rik	NM_025969	1	5
Hps4	NM_138646	1.01	0
Ahdc1	NM_146155	1.01	13
Tmem55a	NM_028264	1.01	1
Ctnnb1	NM_007614	1.01	1
Snip1	NM_175246	1.01	2
Slc39a5	NM_028051	1.02	8
Mgat2	NM_146035	1.01	4
Rufy3	NM_027530	1.01	3
Rnmtl1	NM_183263	1	5
Hmga1	NM_016660	1.01	2
Efnb2	NM_010111	1	13
Olfr549	NM_147101	1	1
Mesp2	NM_008589	1.01	3
Ftsjd1	NM_146215	1.01	0
Eif2b4	NM_010122	1.01	2
Med6	NM_027213	1.01	1
Cdc42ep4	NM_020006	1.01	6
Park7	NM_020569	1.01	1
Slc35c2	NM_144893	1.01	1
Eif1b	NM_026892	1	3
Tmem209	NM_178625	1.01	3
Ndufaf4	NM_026742	1	0
Fam108b	NM_146096	1	5
Hmgn1	NM_008251	1.01	1
Clca1	NM_009899	1	1
D4Wsu53e	NM_023665	0.99	8
Oas1d	NM_133893	1.01	1
St8sia3	NM_009182	1.01	1
Ankrd23	NM_153502	1	3
P2rx5	NM_033321	1.01	1
Mafg	NM_010756	1.01	1
Ahsa2	NM_172391	1.01	1
Pyroxd1	NM_183165	1.01	3
Prkag1	NM_016781	1.01	9
Cd82	NM_007656	1	0
Olfr183	NM_146485	0.98	0
Gsdmd	NM_026960	1.01	3
Wdr33	NM_028866	1	0
Gm5635	NM_001038697	0.98	0
2210021J22Rik	NM_197998	1	1
Tll2	NM_011904	0.98	1
Mrps22	NM_025485	1.01	1
Hist1h2ae	NM_178187	1.01	36
P4ha2	NM_011031	1.01	3
Rnf10	NM_016698	1.01	12
Atp5f1	NM_009725	1	1
Hist2h2aa1	NM_013549	1.01	19
0610007P14Rik	NM_021446	1	2
Il12b	NM_008352	0.97	0
Bahd1	NM_001045523	1.01	0
Rnase6	NM_030098	0.97	5
Ina	NM_146100	1.01	8
Nras	NM_010937	1.01	6
Rg9mtd3	NM_027266	1	4
Cmpk1	NM_025647	1.01	0
Maml1	NM_175334	1	1
Rab20	NM_011227	1.01	2
Foxl1	NM_008024	1	1
Pelo	NM_134058	1.01	3
Copz1	NM_019817	1	4
Cep120	NM_178686	1.01	2
Rc3h1	NM_001024952	1.01	0
2009-03-04	NM_001045533	1	3
BC016201	NM_145601	1	10
4930453N24Rik	NM_026273	1.01	1
Isca1	NM_026921	1.01	3
Rbm24	NM_001081425	1.01	0
Gsta4	NM_010357	1.01	4
Olfr1257	NM_146982	1.02	0
Timm8a1	NM_013898	1	2
4930428D18Rik	NM_001033799	0.99	0
LOC100039753	NM_001017394	1	0
V1re2	NM_134191	0.99	0
Olfr1385	NM_001011805	0.99	0
Tmem141	NM_001040130	1.01	0
Wfdc8	NM_001080550	1.01	7
Mib1	NM_144860	1.01	1
AI314976	NM_207219	1.01	2
Col9a2	NM_007741	1.01	1
Hist1h3a	NM_013550	1	15
Fbxo30	NM_027968	1	1
Pde6c	NM_033614	1.01	5
Rps4x	NM_009094	1.01	0
Ift88	NM_009376	1.01	5
Stoml3	NM_153156	1	6
Ppp3r1	NM_024459	1.01	0
Olfr462	NM_146411	1.01	3
Nat1	NM_008673	0.96	1
Guk1	NM_008193	1.01	0
Tmprss5	NM_030709	0.98	7
Rps6ka1	NM_009097	1.02	11
Tfg	NM_019678	1.01	0
B430211C08Rik	NM_001039146	1.01	0
Oas1a	NM_145211	1.01	1
Tcap	NM_011540	1.01	4
Abcc6	NM_018795	1.01	1
Fat2	NM_001029988	1.01	2
1700016D06Rik	NM_024271	1	2
Tmem211	NM_001033428	1	3
2310014L17Rik	NM_029809	1	8
Zfp498	NM_001081431	0.97	1
Nhp2l1	NM_011482	1.01	1
2010107G12Rik	NM_001025573	1.01	2
Ttc29	NM_183096	0.98	4
Gm6592	NM_001081564	1.01	0
Zc4h2	NM_001003916	1.01	0
AI317395	NM_144821	0.99	0
Slc15a2	NM_021301	0.98	2
Syn3	NM_013722	1.01	1
Defcr-rs1	NM_007844	0.98	0
Dennd1b	NM_181347	1.01	1
V1rd18	NM_207618	1.01	0
Tmem119	NM_146162	1.01	2
Dnajb6	NM_001037941	1.01	0
G3bp2	NM_001080794	1.01	4
Ssr1	NM_025965	0.98	6
Med15	NM_001040683	1	0
4932431H17Rik	NM_001081262	0.99	2
Rbms2	NM_001039080	0.98	9
Tdpoz3	NM_207271	1.01	0
Gal3st2	NM_199366	1.01	1
Nrap	NM_008733	1.01	0
Puf60	NM_028364	1.01	2
Gm1821	NR_002875	1.01	0
Cyb561d1	NM_001081320	0.99	4
U2af1l4	NM_170760	1	6
Atp2b4	NM_213616	0.99	5
Rprd2	NM_001081293	1	20
Ankrd50	NM_001033198	1.01	0
Fxyd1	NM_052991	1.01	3
Grap2	NM_010815	0.99	4
Gtf2i	NM_001080747	1.01	7
Gpr133	NM_001081342	1.01	5
Npr3	NM_008728	1	0
Tmprss9	NM_001081688	1	5
Gng2	NM_001038637	0.99	2
Tas2r144	NM_001001453	0.98	3
Olfr965	NM_001011859	1.01	1
Tmem204	NM_001001183	0.96	0
7420416P09Rik	NM_001033776	1.01	2
Ate1	NM_001029895	1.01	1
EG214403	NM_001029977	1	0
Kcnrg	NM_001039105	1.01	3
Slc13a5	NM_001004148	1	1
Mafa	NM_194350	1	3
Ly9	NM_008534	0.99	5
Gabre	NM_017369	1	1
Snapc2	NM_133968	1	3
Cdkn2c	NM_007671	0.99	0
Adra2b	NM_009633	1	1
Ric3	NM_178780	0.98	0
Pemt	NM_008819	0.99	4
Olfr724	NM_146492	0.99	0
Nlgn3	NM_172932	0.96	3
Foxj3	NM_172699	0.93	1
Rfx3	NM_011265	1	4
Slc24a4	NM_172152	0.99	1
Il10ra	NM_008348	1	3
Crabp2	NM_007759	0.98	5
Tk2	NM_021028	0.99	1
Hcn3	NM_008227	1	5
2310007A19Rik	NM_025506	0.98	0
Gsg1	NM_010352	0.98	2
Ube2d2	NM_019912	1	11
Commd1	NM_144514	1	8
Kank3	NM_030697	0.99	6
Glrp1	NM_008132	1	5
Agpat2	NM_026212	1	4
St8sia1	NM_011374	0.97	16
Syf2	NM_026780	0.99	8
Morc1	NM_010816	0.99	10
Chrnb3	NM_173212	0.99	5
Napa	NM_025898	0.99	2
Fbxo34	NM_030236	0.96	6
Twist2	NM_007855	1	0
Mrgpra1	NM_153095	0.96	0
Man1c1	NM_207237	0.98	6
Ppp2r2d	NM_026391	1	7
Emb	NM_010330	0.99	3
Rbbp7	NM_009031	1	3
Nr4a3	NM_015743	1	0
Fermt1	NM_198029	1	2
Mrap	NM_029844	1	0
Myg1	NM_021713	1	13
Cpne3	NM_027769	0.99	0
Hdac3	NM_010411	1	13
Toe1	NM_026654	1	6
Olfr393	NM_147008	1	0
Oaz3	NM_016901	1	0
1600012H06Rik	NM_026451	0.98	2
1200011I18Rik	NM_026177	1	2
Olfr161	NM_146860	0.99	0
Ms4a6d	NM_026835	0.98	0
Zfp398	NM_027477	1	2
Ddx26b	NM_172779	1	0
Slmap	NM_032008	0.99	2
A530082C11Rik	NM_177186	1	3
Ptprg	NM_008981	1	3
Elovl1	NM_019422	0.97	3
Gng4	NM_010317	1	4
Car9	NM_139305	0.99	2
Vnn3	NM_011979	1	3
Taar1	NM_053205	0.99	3
Srrt	NM_031405	0.99	6
Olfr1090	NM_146847	0.98	0
Srm	NM_009272	1	2
Shisa2	NM_145463	1	1
Hmmr	NM_013552	1	3
Cul1	NM_012042	1	1
Uck1	NM_011675	0.99	7
Ppap2b	NM_080555	0.99	8
Wdr3	NM_175552	0.99	0
BC005537	NM_024473	1	1
Thbd	NM_009378	1	0
Hnf1a	NM_009327	1	7
1700012B09Rik	NM_029306	1	4
4931414P19Rik	NM_028890	1	7
Me2	NM_145494	1	2
D2hgdh	NM_178882	1	2
Zfp810	NM_145612	1	3
Mmel1	NM_013783	0.99	0
Abca9	NM_147220	1	0
Ctnnbip1	NM_023465	1	2
V1rb7	NM_053228	1	0
Ctnnal1	NM_018761	1	4
Utp15	NM_178918	1	1
Tex13a	NM_026469	1	0
Trpc2	NM_011644	1	5
Serpinb3d	NM_201376	1	0
Sfxn1	NM_027324	1	4
Hsp90ab1	NM_008302	1	11
Rbm3	NM_016809	1	4
Tspan2	NM_027533	0.98	1
Elovl7	NM_029001	1	2
Akt3	NM_011785	1	0
Smad5	NM_008541	0.99	1
Wdr19	NM_153391	0.9	1
Clip1	NM_019765	1	1
Snx3	NM_017472	1	1
Akap8l	NM_017476	1	3
H2afy	NM_012015	0.99	5
Cnpy2	NM_019953	1	7
Wnt3	NM_009521	1	2
Usp27x	NM_019461	1	2
Slc38a2	NM_175121	1	4
Arpc5	NM_026369	1	4
Acsl4	NM_207625	1	1
Hhex	NM_008245	0.99	4
Tmem101	NM_029649	1	3
Ptpn11	NM_011202	0.99	0
Trdmt1	NM_010067	1	4
Olfr690	NM_020290	0.99	0
Fbxl22	NM_175206	1	0
Yap1	NM_009534	1	11
Mc2r	NM_008560	1	0
Homer1	NM_011982	0.99	1
Afmid	NM_027827	1	8
Gjc2	NM_080454	1	0
Ceacam2	NM_007543	1	1
Amd1	NM_009665	0.99	6
Pkd1l2	NM_029686	0.99	8
St5	NM_029811	1	2
Rnf113a2	NM_025525	1	1
Omg	NM_019409	0.99	5
Polr1c	NM_009085	1	3
Cyp2j5	NM_010007	0.98	0
Tcfec	NM_031198	0.97	0
Atp13a2	NM_029097	0.99	1
Atp5d	NM_025313	1	6
Agfg2	NM_178162	1	2
2410042D21Rik	NM_024254	1	3
Nf2	NM_010898	0.99	4
Fgd4	NM_139234	0.99	1
2310003F16Rik	NM_026318	1	2
Chaf1a	NM_013733	1	0
Mep1a	NM_008585	0.96	1
Slc12a2	NM_009194	0.99	0
Tiprl	NM_145513	0.98	0
Hs6st3	NM_015820	1	0
Ift122	NM_031177	1	6
Zic3	NM_009575	1	6
Vps29	NM_019780	1	6
Dcaf4	NM_030246	1	7
4921525H12Rik	NM_177859	0.99	5
Vps18	NM_172269	1	3
Ttc19	NM_028360	1	2
Uap1	NM_133806	1	0
Cul5	NM_027807	1	2
Tmem64	NM_181401	1	2
Fbxo17	NM_015796	1	6
Tbrg4	NM_134011	0.99	3
Pqlc1	NM_025861	1	3
Nudcd1	NM_026149	1	2
Taf6l	NM_146092	0.97	10
Smndc1	NM_172429	1	10
Ddt	NM_010027	1	11
Isoc2b	NM_026158	0.99	6
Cox4i1	NM_009941	1	10
Atpaf2	NM_145427	1	6
Gfral	NM_205844	0.96	2
Acot3	NM_134246	0.99	6
Nme6	NM_018757	1	0
Th1l	NM_020580	1	3
Kcns3	NM_173417	1	0
Abcd4	NM_008992	1	2
1810030O07Rik	NM_175141	1	2
Gpr172b	NM_029643	1	6
Coq4	NM_178693	1	9
Mut	NM_008650	0.96	1
Egr3	NM_018781	1	3
Tbcb	NM_025548	1	6
1700025F22Rik	NM_027074	1	1
Ptpn14	NM_008976	1	1
H2-M10	NM_177634	0.98	0
Rbak	NM_021326	0.99	2
Ehd1	NM_010119	1	7
Ndufa7	NM_023202	1	6
Aprt	NM_009698	0.99	3
Faim	NM_011810	1	4
Cdyl	NM_009881	1	4
Bpil1	NM_025631	1	0
Pcsk1n	NM_013892	1	3
Xpnpep3	NM_177310	1	7
Pstpip1	NM_011193	1	3
Tmem199	NM_199199	1	1
Mtx1	NM_013604	0.99	10
Tarbp2	NM_009319	1	11
Zfp809	NM_172763	0.99	3
Olfr215	NM_146446	1	0
Rapgef5	NM_175930	1	3
Stat2	NM_019963	1	11
Klhl7	NM_026448	0.99	4
Mat1a	NM_133653	1	2
Manea	NM_172865	1	1
Kcnj14	NM_145963	0.98	2
Rin3	NM_177620	1	1
Mafk	NM_010757	0.98	0
Olfr1288	NM_146400	1	0
Nkx3-2	NM_007524	0.96	1
Ins2	NM_008387	1	0
Arl8a	NM_026823	1	5
Prpf39	NM_177806	1	0
Olfr1347	NM_146385	0.99	3
Chrnb1	NM_009601	0.99	6
Ndufs7	NM_029272	1	4
Npr2	NM_173788	1	3
Rg9mtd1	NM_029092	1	1
Ly6g5c	NM_148947	0.98	8
Atp5g3	NM_175015	1	2
Ddx59	NM_178052	0.98	6
Hlcs	NM_139145	0.99	1
Olfr58	NM_011001	1	0
Qdpr	NM_024236	1	3
Rps19bp1	NM_175109	1	3
Nipa1	NM_153578	1	1
Foxd1	NM_008242	0.99	1
Cdc16	NM_027276	1	3
Rpl39	NM_026055	1	0
Nupl2	NM_153092	1	5
Neu3	NM_016720	1	1
Pold3	NM_133692	1	1
Mlf2	NM_145385	1	4
D10Ertd322e	NM_026065	0.99	12
BC023882	NM_146159	0.99	0
Crybb3	NM_021352	1	1
Lpgat1	NM_172266	1	1
Ccr8	NM_007720	0.99	7
Dapk1	NM_029653	1	5
Lrrc29	NM_177449	0.99	7
Fdxacb1	NM_198675	1	2
Pop1	NM_152894	0.99	4
Mtmr9	NM_177594	0.99	5
Gna11	NM_010301	1	5
Ces8	NM_146213	1	4
Mkrn3	NM_011746	0.99	3
Fjx1	NM_010218	0.97	2
Cmc1	NM_026442	1	0
Olfr693	NM_146453	1	0
Bccip	NM_025392	1	2
Cenpq	NM_031863	1	1
Mier2	NM_027422	1	1
Son	NM_019973	1	4
Dbx2	NM_207533	1	2
Tcf25	NM_025804	1	7
Adam19	NM_009616	1	7
Phc1	NM_007905	1	5
Proca1	NM_001045516	0.98	6
Olfr419	NM_146715	1	1
Stk40	NM_028800	1	1
Tmem216	NM_026798	0.99	2
Adnp	NM_009628	1	4
Pex16	NM_145122	1	2
Plekhg6	NM_198604	1	11
Slc25a16	NM_175194	0.99	10
Cacna2d3	NM_009785	0.98	1
Zfp69	NM_001005788	0.98	2
Eras	NM_181548	0.98	3
Slc22a7	NM_144856	1	3
Fam107a	NM_183187	1	4
Alk	NM_007439	1	0
Zbtb8a	NM_028603	1	12
Olfr1109	NM_146766	0.99	0
AI413582	NM_001002895	1	2
Snrnp27	NM_025665	1	2
Pnrc2	NM_026383	1	2
Gm4976	NM_001013764	1	0
Accsl	NM_001033452	0.98	1
Agxt2	NM_001031851	0.98	1
Cnr2	NM_009924	1	3
Stk32c	NM_021302	1	3
Gm9294	NM_001081036	1	0
Acsl5	NM_027976	1	7
Ankrd2	NM_020033	1	3
Tmem161a	NM_145597	0.99	3
Slc35f4	NM_029238	0.99	1
Icam1	NM_010493	1	8
Umod	NM_009470	0.98	0
Zdhhc17	NM_172554	1	5
Opalin	NM_153520	0.99	2
Ssrp1	NM_182990	1	1
Napg	NM_028017	1	0
Capza1	NM_009797	1	4
Sh3d20	NM_183288	0.97	4
Ociad2	NM_026950	1	2
BC002163	NR_002445	1	10
Psg27	NM_001037168	0.98	0
Rtn4ip1	NM_130892	1	2
Cdan1	NM_026891	1	0
V1rh17	NM_145850	0.99	16
Inpp5a	NM_183144	1	2
Olfr467	NM_001005488	1	4
Tas2r105	NM_020501	1	0
Cyp26b1	NM_175475	0.99	0
Sgsm3	NM_134091	1	4
Tmsb15b2	NM_001080967	1	2
Dclk2	NM_027539	1	2
Snrnp25	NM_030093	1	1
Olfr301	NM_212436	0.97	0
Lpcat1	NM_145376	1	1
2610305D13Rik	NM_145078	0.99	5
Nol10	NM_001008421	1	3
Gm11435	NM_001045543	1	0
Wdr47	NM_181400	1	4
Rap1gap	NM_001081155	0.98	5
Rreb1	NM_001013392	0.99	5
Gja6	NM_001001496	1	0
Stk32b	NM_022416	0.98	3
5133400G04Rik	NM_029485	0.99	10
Coq10b	NM_001039710	1	4
Esco1	NM_001081222	1	2
Olfr121	NM_146629	1	0
Gcet2	NM_008099	0.96	1
Pcdhac1	NM_001003671	0.98	2
1810030J14Rik	NM_025470	0.99	1
Olfr138	NM_130868	0.98	0
Cdh12	NM_001008420	1	0
Tcte3	NM_198104	0.99	2
Bclaf1	NM_001025393	0.99	7
4930503B20Rik	NM_029144	1	2
Mcfd2	NM_139295	1	2
Sspo	NM_173428	1	2
Trappc9	NM_180662	0.99	2
Tmem47	NM_138751	1	0
Hbs1l	NM_001042593	1	4
Ptbp1	NM_008956	1	7
C4b	NM_009780	0.99	2
Magi1	NM_001029850	1	2
Rex2	NM_009051	1	2
Akap1	NM_001042541	0.98	13
Mipol1	NM_001037746	1	1
Cxcl12	NM_001012477	0.95	2
Pou2f1	NM_198932	0.99	4
Tdrd1	NM_001002240	0.99	1
Gm13034	NM_001039233	0.99	3
Spam1	NM_001079875	1	0
Npnt	NM_001029836	0.97	0
Olfr1425	NM_001011853	1	0
Ypel2	NM_001005341	0.99	4
Ripply1	NM_001037915	0.95	0
Krt74	NM_001003669	0.99	0
Xkrx	NM_183319	1	0
4930428E23Rik	NM_001033786	1	0
Olfr1318	NM_001011802	1	1
Aox3l1	NM_001008419	0.99	2
C230055K05Rik	NM_001039231	1	0
Fank1	NM_025850	0.98	2
Strap	NM_011499	0.99	1
Vmn2r42	NM_009493	0.98	0
Rab4a	NM_009003	0.99	4
Mcrs1	NM_016766	0.99	3
Med16	NM_198107	0.99	7
Tm9sf1	NM_028780	0.96	7
Acat3	NM_153151	0.98	0
Slc17a2	NM_144836	0.99	10
4921520G13Rik	NM_025732	0.99	2
Pvalb	NM_013645	0.99	0
Slc9a3r2	NM_023449	0.99	3
Chdh	NM_175343	0.98	1
Olfr656	NM_147075	0.98	0
Ssbp3	NM_023672	0.98	9
Hace1	NM_172473	0.99	4
Cd22	NM_009845	0.96	3
Rps6kb1	NM_028259	0.99	8
Fbl	NM_007991	0.99	3
Wdr69	NM_027725	0.98	2
St3gal1	NM_009177	0.96	2
Prkd1	NM_008858	0.94	0
Gm5134	NM_198635	0.98	14
Ache	NM_009599	0.98	7
Atp8b3	NM_026094	0.99	1
Rab18	NM_181070	0.99	3
Pctk3	NM_008795	0.98	14
Fcgr1	NM_010186	0.99	19
Spon2	NM_133903	0.96	0
Fibcd1	NM_178887	0.98	3
Krt16	NM_008470	0.98	7
Pafah1b2	NM_008775	0.99	2
Fmod	NM_021355	0.99	1
Csmd1	NM_053171	0.98	0
Trim44	NM_020267	0.99	2
Tas2r110	NM_199155	0.99	0
Olfr569	NM_147088	0.99	0
Olfr262	NM_146688	0.99	0
Hnrnph1	NM_021510	0.99	1
Cops8	NM_133805	0.99	2
Lin28	NM_145833	0.98	10
D19Bwg1357e	NM_177474	0.99	0
Ets1	NM_011808	0.98	0
Map3k12	NM_009582	0.93	11
Mmp1b	NM_032007	0.99	0
Notch4	NM_010929	0.97	0
Tacr3	NM_021382	0.96	0
Olfr1325	NM_146398	0.99	0
3300002I08Rik	NM_027017	0.99	1
Rgs3	NM_134257	0.99	5
Adam10	NM_007399	0.99	2
Cdc23	NM_178347	0.99	7
Trmt11	NM_028604	0.99	5
1700094C09Rik	NM_024279	0.97	13
Nat15	NM_029090	0.99	1
Nfkbid	NM_172142	0.99	5
Olfr714	NM_147033	0.98	1
1700019M22Rik	NM_027076	0.98	0
Hivep2	NM_010437	0.99	4
Tbxa2r	NM_009325	0.98	8
Gga1	NM_145929	0.99	0
Rps16	NM_013647	0.99	7
Gzma	NM_010370	0.98	4
Esrrb	NM_011934	0.97	6
4921524J17Rik	NM_025722	0.99	5
Psmd4	NM_008951	0.99	4
Parp12	NM_172893	0.99	2
Rap1b	NM_024457	0.99	10
Vezf1	NM_016686	0.99	9
Fem1b	NM_010193	0.99	3
Mobkl1b	NM_145571	0.99	3
Ate1	NM_013799	0.99	1
Slco1b2	NM_178235	0.98	1
Gpaa1	NM_010331	0.98	3
Ddx17	NM_199080	0.99	2
Olfr152	NM_146646	0.98	0
Trappc2	NM_025432	0.98	1
Traf7	NM_153792	0.99	2
Tcam1	NM_029467	0.97	2
Rab11fip4	NM_175543	0.98	4
Crnkl1	NM_025820	0.98	5
E430028B21Rik	NM_178668	0.98	3
Ppp4c	NM_019674	0.99	5
Ap2a2	NM_007459	0.99	1
Nlk	NM_008702	0.99	1
Pcdhb19	NM_053144	0.98	1
Inadl	NM_172696	0.97	3
Plrg1	NM_016784	0.99	2
Tmem186	NM_025708	0.99	4
Nans	NM_053179	0.99	5
Aldh7a1	NM_138600	0.99	8
Dnajc28	NM_138664	0.98	3
Nqo2	NM_020282	0.98	7
Samm50	NM_178614	0.99	5
Gimap7	NM_146167	0.97	1
Socs4	NM_080843	0.99	3
Mff	NM_029409	0.99	1
Entpd6	NM_172117	0.98	2
Dnmt3b	NM_010068	0.99	8
Olfr470	NM_146425	0.98	3
Rps6kb2	NM_021485	0.98	4
2010001M09Rik	NM_027222	0.99	10
Rprd1b	NM_027434	0.99	5
Arhgap25	NM_175476	0.96	0
Akap3	NM_009650	0.98	1
4930471M23Rik	NM_175675	0.99	0
Fxyd2	NM_052823	0.99	4
Zfp131	NM_028245	0.99	0
Slc17a7	NM_182993	0.98	4
Zfp191	NM_021559	0.99	1
Stx12	NM_133887	0.99	8
Tmem30a	NM_133718	0.98	2
Zfp553	NM_146201	0.99	5
Uso1	NM_019490	0.99	5
Zfp451	NM_133817	0.99	4
Rabl2a	NM_026817	0.99	1
1700065D16Rik	NM_028533	0.93	0
Pcyt2	NM_024229	0.96	1
Kti12	NM_029571	0.98	3
Srp68	NM_146032	0.99	8
Gnl3	NM_153547	0.99	0
Pbx3	NM_016768	0.99	4
Upf1	NM_030680	0.99	1
Atp5e	NM_025983	0.99	2
Mfsd3	NM_027122	0.99	5
Atic	NM_026195	0.99	5
Ptgr1	NM_025968	0.98	2
Rpusd1	NM_028009	0.99	3
C330027C09Rik	NM_172616	0.98	0
Chrnb4	NM_148944	0.99	7
4933406M09Rik	NM_173771	0.92	6
D230025D16Rik	NM_145604	0.96	5
Stil	NM_009185	0.96	0
Rya3	NM_194357	0.99	0
Scly	NM_016717	0.99	0
E2f7	NM_178609	0.97	3
Mkrn1	NM_018810	0.99	5
Cox10	NM_178379	0.99	6
Mrpl17	NM_025301	0.99	1
Cd8b1	NM_009858	0.99	2
Ptprr	NM_011217	0.99	0
Cd209e	NM_130905	0.91	1
Cstad	NM_030137	0.98	11
Cabyr	NM_027687	0.97	2
Ubxn2b	NM_026534	0.99	0
E4f1	NM_007893	0.99	1
Sbsn	NM_172205	0.97	4
Naca	NM_013608	0.99	7
Zfp12	NM_177681	0.99	2
Fgfr1	NM_010206	0.97	9
Pnma3	NM_153169	0.99	0
Hap1	NM_010404	0.99	7
Cyp2c39	NM_010003	0.98	0
Muc13	NM_010739	0.97	9
B4galt1	NM_022305	0.98	8
Lin7c	NM_011699	0.99	5
Psmb4	NM_008945	0.99	2
Htt	NM_010414	0.99	3
Myh9	NM_022410	0.98	6
Dnalc4	NM_017470	0.94	8
Nek7	NM_021605	0.97	0
Mcm7	NM_008568	0.98	2
Cdv3	NM_175833	0.99	2
Slc15a4	NM_133895	0.99	4
Rps17	NM_009092	0.99	7
Emilin3	NM_182840	0.99	2
Cmas	NM_009908	0.99	6
Cldnd1	NM_171826	0.99	1
Tal2	NM_009317	0.99	4
Ruvbl2	NM_011304	0.98	8
Ggt5	NM_011820	0.97	1
Nlrp2	NM_177690	0.99	0
Fibin	NM_026271	0.97	1
Ch25h	NM_009890	0.98	0
Cstb	NM_007793	0.98	5
Eef1e1	NM_025380	0.98	1
Fam160b1	NM_145505	0.99	3
Gse1	NM_198671	0.98	13
Gstm5	NM_010360	0.98	3
Decr2	NM_011933	0.99	4
Tbc1d1	NM_019636	0.97	5
Pax7	NM_011039	0.98	5
Fkbpl	NM_019873	0.99	0
Cst10	NM_021405	0.99	0
Polrmt	NM_172551	0.99	4
2009-03-05	NM_027314	0.99	5
G3bp1	NM_013716	0.99	2
Npvf	NM_021892	0.98	1
Hcfc1	NM_008224	0.99	3
Sdf4	NM_011341	0.99	1
Bbs4	NM_175325	0.99	4
Nkx2-4	NM_023504	0.92	3
Erc1	NM_178085	0.97	1
Snap29	NM_023348	0.99	4
Evl	NM_007965	0.99	0
Olfr96	NM_146514	0.98	3
Sfrs3	NM_013663	0.97	15
Adcy9	NM_009624	0.98	5
Cpt1c	NM_153679	0.98	1
Polr2d	NM_027002	0.98	0
Nit1	NM_012049	0.95	8
Cdc25c	NM_009860	0.99	4
Mtpap	NM_026157	0.99	1
Aco2	NM_080633	0.99	1
Ddx20	NM_017397	0.98	1
Itpka	NM_146125	0.99	7
Lrrc46	NM_027026	0.98	5
Olfr726	NM_146316	0.99	0
Olfr90	NM_146477	0.97	11
Ins1	NM_008386	0.98	0
Gmds	NM_146041	0.99	0
Ercc5	NM_011729	0.99	0
Pcdhga2	NM_033585	0.98	8
Eif3d	NM_018749	0.99	6
Smtnl1	NM_024230	0.98	5
Sumo3	NM_019929	0.99	0
Lrrc3b	NM_146052	0.97	1
Nlrp14	NM_001002894	0.98	3
Plxnc1	NM_018797	0.99	2
Ahcyl2	NM_021414	0.99	3
Hnrnpf	NM_133834	0.99	4
Fetub	NM_021564	0.99	3
Dnajc24	NM_026992	0.99	0
Myadm	NM_016969	0.98	5
Hes7	NM_033041	0.98	12
Kif11	NM_010615	0.98	6
Zyg11b	NM_001033634	0.99	5
Rpl18	NM_009077	0.98	3
Zdhhc15	NM_175358	0.99	1
Ntan1	NM_010946	0.99	3
Myst1	NM_026370	0.98	8
AU022252	NM_001012400	0.99	8
Prm1	NM_013637	0.99	2
Ldoc1	NM_001018087	0.98	0
Zmym1	NM_026670	0.99	6
Pigf	NM_008838	0.99	2
Memo1	NM_133771	0.98	4
Fam128b	NM_029354	0.99	1
Tmem120b	NM_001039723	0.99	10
1600014C10Rik	NM_028166	0.98	4
Abo	NM_030718	0.97	1
A230069A22Rik	NM_001033394	0.96	2
9530077C05Rik	NM_026739	0.99	2
Gm1631	NM_201366	0.98	12
Lrfn3	NM_175478	0.98	7
C77080	NM_001033189	0.97	9
Rtp2	NM_001008230	0.98	1
Psen2	NM_011183	0.99	4
Igsf9b	NM_001033323	0.99	1
Klk4	NM_019928	0.98	0
4930526D03Rik	NM_199023	0.99	0
Rpn2	NM_019642	0.99	4
Fmo9	NM_172844	0.98	0
2810008M24Rik	NM_001048250	0.98	4
Mtap7d2	NM_001081124	0.99	0
Dbf4	NM_013726	0.99	2
Olfr1251	NM_001011529	0.99	0
Rps12	NM_011295	0.98	3
Dpcr1	NM_001033366	0.98	9
Lce1b	NM_026822	0.99	0
Mthfd1	NM_138745	0.99	7
AI597479	NM_133818	0.99	2
Ppie	NM_019489	0.99	3
Diap1	NM_007858	0.99	12
Adam30	NM_027665	0.98	2
1500031L02Rik	NM_025892	0.99	6
Tuba1b	NM_011654	0.99	11
Qars	NM_133794	0.99	6
Bola3	NM_175277	0.99	3
Cdc27	NM_145436	0.99	2
Olfr538	NM_001011867	0.99	0
Sema3g	NM_001025379	0.98	0
Armcx5	NM_001009575	0.99	0
Cyp4f13	NM_130882	0.99	2
Kbtbd8	NM_001008785	0.99	1
Becn1	NM_019584	0.99	7
Olfr711	NM_147035	0.94	0
Rbm44	NM_001033408	0.98	1
Als2cr4	NM_001037812	0.99	2
Cebpg	NM_009884	0.99	0
Ptbp1	NM_001077363	0.98	7
Mos	NM_020021	0.91	1
Doxl2	NM_001029987	0.9	1
Itprip	NM_001001738	0.99	0
Palb2	NM_001081238	0.99	4
Ccdc9	NM_172297	0.99	3
Gm6086	NM_001039219	0.97	1
Ccdc61	NM_001033314	0.98	0
Brsk2	NM_029426	0.97	0
Rab11fip5	NM_001003955	0.98	2
Enpp7	NM_001030291	0.99	2
Cxx1b	NM_001018063	0.98	0
Gtf3c3	NM_001033194	0.99	1
Dhx38	NM_178380	0.99	3
Lrba	NM_001077687	0.99	1
Olfr1344	NM_177061	0.99	5
Zfp345	NM_001034900	0.99	2
Gm10439	NM_001037716	0.98	0
Col28a1	NM_001037865	0.96	1
Fam83e	NM_001033170	0.99	3
Gm5464	NM_001034881	0.99	1
Gpr180	NM_021434	0.99	0
9330176C04Rik	NM_175420	0.97	5
2010015L04Rik	NM_177674	0.99	1
Zmiz2	NM_028601	0.99	3
Fdxr	NM_007997	0.98	4
Adpgk	NM_028121	0.97	2
Kcnab1	NM_010597	0.98	0
Txndc11	NM_029582	0.97	5
Htr2c	NM_008312	0.97	0
C6	NM_016704	0.97	0
Fmn2	NM_019445	0.98	0
