# Supplementary material for: CHD7 Targets Active Gene Enhancer Elements to Modulate ES Cell-Specific Gene Expression
Source: PLoS Genet. 2010 Jul 15;6(7):e1001023. doi: 10.1371/journal.pgen.1001023 (PMC2904778; doi:10.1371/journal.pgen.1001023)
Supplement: Table S4 — CHD7 sites tested for enhancer activity. (0.03 MB XLS) [file pgen.1001023.s009.xls]

## Sheet: Sheet1
Supplemental Table IV - CHD7 sites tested for enhancer activity.
ID	chrom	peak_start	peak_end	Group*	Forward Primer	Reverse Primer
1	chr10	84339817	84341323	1	ACACTGTACAAGAATGGCAGCTT	CTGAAAGGAGCAGGACAGAATAA
2	chr11	95833232	95835121	1	ACTAGACAGGCAGGCTATCACAG	AGGAGTTTTCTCTCAGGGCTTTT
3	chr11	117791199	117793006	1	CTCAAATCCTCACGTCTCAGATT	GTACAGCCACTTCTGCTCTCG
4	chr13	98383164	98384223	1	GGTACAGGTGCATGTTCTTTGAT	AAACTCCCTTTAGCTTCCTCAGA
5	chr14	25892477	25893558	1	TTCATGCAAAAAGCTGAAATTCT	GCAATTCATGACAGTTTCTCTCC
6	chr14	47676040	47676652	1	CTTAGTGCCACAAGGAAGATAGG	CACAGCTGCAGCAATTAGAAACT
7	chr15	88695064	88696029	1	ACAAAGATGACAGACAAGCCAAG	CTGGCTACCACAAAGTAAACAGG
8	chr15	101104985	101105736	1	TATATTTGGTCCTTCACCCACTG	AGACTTGGAGGCCAGTTCTTC
9	chr17	45070224	45071541	1	AGGTTGTTAGCAAGCATTGATGT	GTGAAAGCTAATGAGCAAGGAAA
10	chr17	46974408	46975405	1	ACCAGGCAGAATCTCCATAAAAT	GCCTTCCTAGTGCTGAGACTAAA
11	chr19	5848742	5849722	1	TTCTGATTTATCCCCGTACTTTG	AGACCAAAGCCAGGTTGTAGAAG
12	chr5	122451923	122453087	1	AGCCAGTTTTGCATGAAAGTAAC	ATGCTACTTACTGGCTTCCTTCC
13	chr6	70893104	70894321	1	TTCTACCATTTCCTGAGTGCTGT	CTGTTGGGAAATTCCTTCTCTCT
14	chr6	82669177	82669886	1	GGAATAACTCAGAGGGTGAAAGG	CTCATTAGCATGGAGAGGCTTTT
15	chr6	122627618	122629867	1	AGCGATTCTTTTCAAACAAAGGT	CTAGGAAGGCCTTTTCTCTTCTG
16	chr7	3728028	3728454	1	TCAGACTGAAGACTCACATCCAG	GTGGTGAAGCAGGATTAAGGAG
17	chr7	63835781	63836614	1	GACCATGGTTAGTGAAGGCAGT	ACCGTTCACAGTACCATCTTTTG
18	chr1	91701203	91702376	1	GGCTACAGTCAAGAGTTTGCAGT	CTATTCAGAGGGAGTGTGTGTCC
19	chr1	182724672	182726259	1	CACTTCTGTGACCACTCAGAACA	AGAAAAACAGAGGGTCAATCTCC
20	chr10	76642566	76643272	1	CTCTAAGCAAAGGACAGGGAAGT	CAGATGTACCCAGTTGACAGACA
21	chr10	119574165	119575063	1	TTTGTCTTGCAAAGTCTCTCTCC	TTCCTTTTTCTCCACTCCATTTT
22	chr11	3030502	3031206	1	GTACCCACTCTGCCTTTTTAGGT	GTCTTATAAGGTCAGCCCCACAG
23	chr11	87955924	87956764	1	GGGTATGCAGTTTTTGTCTTCTG	TTCAATAAATAAGGCAGGGTTTG
24	chr11	100191924	100192736	1	CACTGAGTATATCCAAGGCTGGT	GAGCTCATTAACACTGGGTCCTA
25	chr11	117704065	117704736	1	CATGGCTACACAGTTTGTCTCAA	CAGACTCCTGAGGCCTGCT
26	chr11	117791199	117793006	1	CTCAAATCCTCACGTCTCAGATT	GTACAGCCACTTCTGCTCTCG
27	chr14	53366111	53366660	1	GTACATAAACACATGCAGGCAAA	TGCAGATTGCTTTCCAATCTAAT
28	chr15	98820852	98822183	1	GACCATCCTGCCTCTTCTTTTAT	CTCCACCTACATAGAGGCTTGAA
29	chr16	10888423	10888688	1	GCAGCTCTGAATTCTATGAAAGC	CATGGAAAATGAGACAGACACA
30	chr17	31536584	31537376	1	GGGGTGTAACTTGCTACTTCCTA	TTCCAGACACTTCATTTCTTGGT
31	chr17	31539955	31540455	1	CCAAATGGGACATCACATAGATT	CTCTGTAGGCCTTGAACTCAGAA
32	chr19	5794711	5796225	1	CTCAGAGAAGTTCTGACCTCCAA	CTCTCATTGTGTGCTTCTTTGTG
33	chr19	29073851	29074795	1	AAAGCCTGCTCTTATAGGGACAC	TGTCCTGAAACTCCCTCTGTAAA
34	chr2	152511665	152512265	1	GAATTAAGAGGAGGGGTTGCTTA	TTCTTGGAGATTGATGACTGGTT
35	chr2	155260649	155261166	1	CCAGGCTGTTTATTCACCATAAG	ATTGATTTTGTTGACCATCAGGT
36	chr4	55484923	55486028	1	TTATCTCAAGAGCTGGCTTTCAC	CTCCTGAGTACAGGCTTCTCAAA
37	chr1	34044819	34045335	2	CAAATGAGCATTCAAGCACATAG	GGGGGAATAGAACAGGAAAATTA
38	chr10	79227133	79227430	2	GCCATTATATCCAGCAGAAGTCA	CTAGCAGTGTTGTGGAGGGTAAT
39	chr11	98708533	98708884	2	CAAGCCTACAACAGGGAGAAAC	ATAAAAAGGCACCCAATAAGACC
40	chr11	106449593	106450078	2	CTCACCTCCTCCCCTAGCATA	TTCGGGATAGGGTTTCTCTGTAT
41	chr11	118864505	118864900	2	ATGGCTTATCTGGAACAACACAC	AGACTGGGTAGGGAACTGAACTC
42	chr12	60091330	60092065	2	AAAGGGACAGGTAAATGCTCTTC	GACCTTTGGAACTATTGGCTCTT
43	chr12	77786435	77786994	2	ACACACACAGTTTCCCTCTGAGT	AGAGCCCTACCCAATAATACAGG
44	chr13	23305956	23306875	2	TGAACCCCATGATAACACACATA	CCAAGGCATAAGATGACATAAGG
45	chr13	41005970	41006395	2	GTTTTGAGGAAACAGGAGGTCTT	CTCGTCTAGAGAGCAAGTTCCAG
46	chr13	98392772	98393668	2	GTCTACGTGCCAATGAGGTAAAG	GTGTGTCATTTCCATGAGTTCCT
47	chr14	33145199	33145997	2	TCAGCACACAGTGCTTTGTTTAT	TGTAATTCTAGCACACAGGCAAC
48	chr14	56489214	56489539	2	GCAGCAGCTAGAGAAGAACTGAC	TGGGAGAAGCTTTAGGCTCTATT
49	chr16	32222399	32223197	2	AGAGTGGTGGAAGGACCTATTTC	TGGAATCTCTATGGAGACAAGGA
50	chr17	31463097	31463704	2	GACAGACGGAGACCATATCTCAC	AGTCTCTGCTCGACAGACTCTTG
51	chr2	4476354	4477084	2	GTTACAAGCAAAATCAGCCATTC	CCGTTAATGTGTAAGAGCCTCAG
52	chr2	146530052	146530632	2	TCTTAGCCCTATTGAACTGCAAA	CCCACTCATCTTGACCTTGAAT
53	chr2	154342615	154343274	2	TCTGTGGATTGAACATCACACTT	ACTACAAAGGACAGGGCTTCAGT
54	chr1	87863434	87863968	2	TGCGAGTTTACTTTTCAAAGCTC	GTTGGGTTGAGTCCTTCCTTAGT
55	chr1	88131209	88131874	2	CACAGAGGACCCATCATAGAAAG	GGTCTGCAGAGACTTAAGATGGA
56	chr1	91587566	91588103	2	GAGAATATCAGGGCTTTTGACAG	CTTGGGTTCTGCACTTTTTACAC
57	chr1	91707126	91708424	2	CAGCAGGTCCAGACTACTAATCC	CAAGAGGAACCACAAAGTACAGG
58	chr10	90611750	90612697	2	GGCGGGGATACTAACCACTATAC	GTGAAGCGGTCAGTAAATTCAAG
59	chr15	77828800	77829208	2	GTGGGTCAAGGTAAAAGAGTGTG	CAAACTAGGGATGGCTAAATGTG
60	chr16	38455971	38456301	2	CACAGACATTGACCCTGTGTTTA	TATCCCCTGAAAGATCAGCTATG
61	chr17	28883048	28883401	2	TCCCTGTCTACCTCCTTTAGCTC	TCAACACAATAGTCCCTGAGGTT
62	chr17	74972375	74972756	2	GGTGAATGCAGTTGCTTTCTATT	CAGAACCAGTAGGTGGTCAGTTC
63	chr19	46582148	46582455	2	TCTCAGGCTGTGGACTTTTCTAC	CTTGTAAAGTCCCGTTTCCTTCT
64	chr2	44980137	44980980	2	CATCGTTGTAGAGAGGGAGAAAA	AAATCAGCATTTTCAGTGGACAA
65	chr2	130324365	130324709	2	TGTTTTGTGTTAATGCCTTTTCC	AGATTCTATCTCCCCAAGACAGG
66	chr5	23870769	23871427	2	TGTAAGGATTTGTGCAAGGAAGT	ACTCAGGATGTAACTCACGCTGT
67	chr5	98550328	98550816	2	CAAGAAGGTCTGTGTTGGTGTAA	ATTCCCACTGAAATCACTGTTGT
*Group I= CHD7 and p300; Group 2 = CHD7
